# Supplementary material for: Noninvasive Hemodynamic Evaluation Following TAVI for Severe Aortic Stenosis
Source: PubMed Central journal article supplement — J Am Heart Assoc. 2023 Mar 21;12(7):e028479. doi: 10.1161/JAHA.122.028479 (PMC10122892; doi:10.1161/jaha.122.028479), 2023-03-21
Supplement: JAH3-12-e028479-s001.pdf [file JAH3-12-e028479-s001.pdf]

# **Supplemental Material**

**Figure S1 and Table S1:** The NICaS -whole body (regional) impedance cardiography- parameters derivation and formulas (courtesy of NImedical).

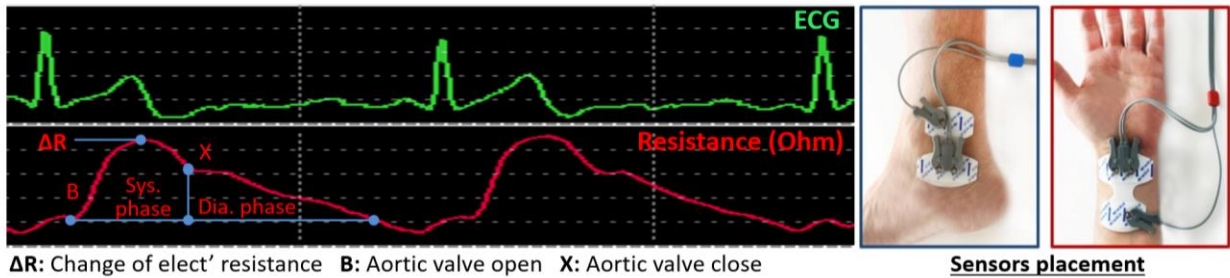

| Parameter                         |      | Definition                                                                                  | Normal Range                                              | Derivation/Formula                           |
|-----------------------------------|------|---------------------------------------------------------------------------------------------|-----------------------------------------------------------|----------------------------------------------|
| Heart Rate                        | HR   | Number of heart beats each minute                                                           | 60 - 90 bpm (beats per minute)                            | Measurement of the R-R interval on the ECG   |
| Stroke Volume                     | SV   | Amount of blood pumped by the left ventricle each heartbeat                                 | 60 - 130 ml                                               | $SV \sim \Delta R / R$                       |
| Stroke Index                      | SI   | Stroke volume normalized for body surface area                                              | 35 - 65 ml/m <sup>2</sup>                                 | $SI = SV / BSA$                              |
| Cardiac Output                    | CO   | Amount of blood pumped by the left ventricle each minute                                    | 4.0 – 8.0 l/min                                           | $CO = HR \times SV / 1000$                   |
| Cardiac Index                     | CI   | Cardiac Output normalized for body surface area                                             | 2.5 - 4.0 l/min/m <sup>2</sup>                            | $CI = CO / BSA$                              |
| Cardiac Power Index               | CPI  | An indicator of myocardial contractility                                                    | 0.45 – 0.85 w/m <sup>2</sup>                              | $CPI = CI \times MAP \times 0.0022$          |
| Granov Goor Index                 | GGI  | An indicator of Left Ventricular Function, which is strongly related to Ejection Fraction   | > 10.0 (equals an Ejection Fraction > 55%)                | $GGI = \Delta R / R \times \alpha \times HR$ |
| Total Peripheral Resistance       | TPR  | The resistance to the flow of blood in the arterial system ("Afterload")                    | 770 - 1500 dynes x sec /cm <sup>5</sup>                   | $TPR = MAP / CO \times 80$                   |
| Total Peripheral Resistance Index | TPRI | The resistance to the flow of blood in the arterial system normalized for body surface area | 1600 - 3000 dynes x sec /cm <sup>5</sup> x m <sup>2</sup> | $TPRI = MAP / CI \times 80$                  |
| Total Body Water                  | TBW  | The amount of fluids as a % of body weight                                                  | Individually calculated as per gender and BMI             | $TBW \sim Ht^2 / R$                          |
| Respiration Rate                  | RR   | Number of breaths each minute                                                               | 8 – 24 breaths / minute                                   |                                              |

**Table S2:** NICaS parameters over time – 4-time points (n=67)

| mean±SD                      | Baseline<br>Nicase (1) | Nicase shortly<br>Following<br>TAVI (2) | Nicase before<br>discharge (3) | Follow-up<br>Nicase (4) | P-value |
|------------------------------|------------------------|-----------------------------------------|--------------------------------|-------------------------|---------|
| Systolic BP, mmHg            | 132.7±23.2             | 148.5±24.7                              | 136.6±20.1                     | 136.6±16.5              | <0.001  |
| Diastolic BP, mmHg           | 64.1±11.7              | 60.9±11.4                               | 62.7±11.5                      | 68.5±10.8               | <0.001  |
| MAP, mmHg                    | 86.6±12.1              | 89.7±13.1                               | 87±11.5                        | 90.8±10.1               | 0.028   |
| HR, bpm                      | 68.5±12.4              | 69±13                                   | 76.6±13.4                      | 68.8±10.1               | <0.001  |
| RR, breaths per<br>minute    | 19.4±3.6               | 17.1±3.5                                | 19.5±3.7                       | 19.3±3.3                | <0.001  |
| SV, mL                       | 62.3±14.2              | 56.1±15.5                               | 57.7±19.6                      | 63.3±18                 | 0.002   |
| SVi, mL/m <sup>2</sup>       | 34.8±7.2               | 31.2±7.5                                | 32±9.7                         | 35.3±8.8                | 0.001   |
| CO, L/min                    | 4.2±1.1                | 3.8±1.2                                 | 4.31.3                         | 4.3±1.36                | 0.02    |
| CI, L/min/m <sup>2</sup>     | 2.35±0.58              | 2.14±0.58                               | 2.39±0.66                      | 2.42±0.68               | 0.013   |
| TPR, dynes*s/cm <sup>5</sup> | 1762±484               | 2110±767                                | 1769±801                       | 1833±557                | 0.002   |
| TBW, %                       | 38.3±8.17              | 44.2±11.8                               | 43.3±17.6                      | 38.8±8.13               | 0.007   |

BP – blood pressure; CO – cardiac output; CI – cardiac index; HR – heart rate; MAP – mean arterial pressure; RR – respiratory rate; SD – standard deviation; SV – stroke volume; SVi – stroke volume index; TBW – total body water; TPR - total systemic peripheral resistance.

**Figure S2:**

**A. Correlation between hemodynamic measures assessed by invasive catheterization and NICaS in a validation cohort**

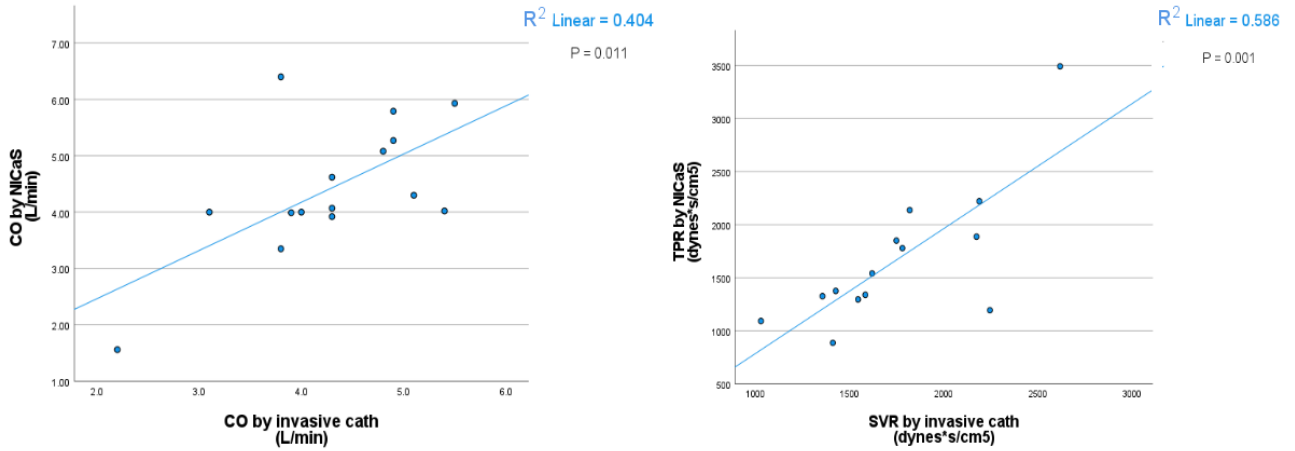

**B. Bland-Altman plot of agreement between hemodynamic measures assessed by invasive catheterization and NICaS in a validation cohort**

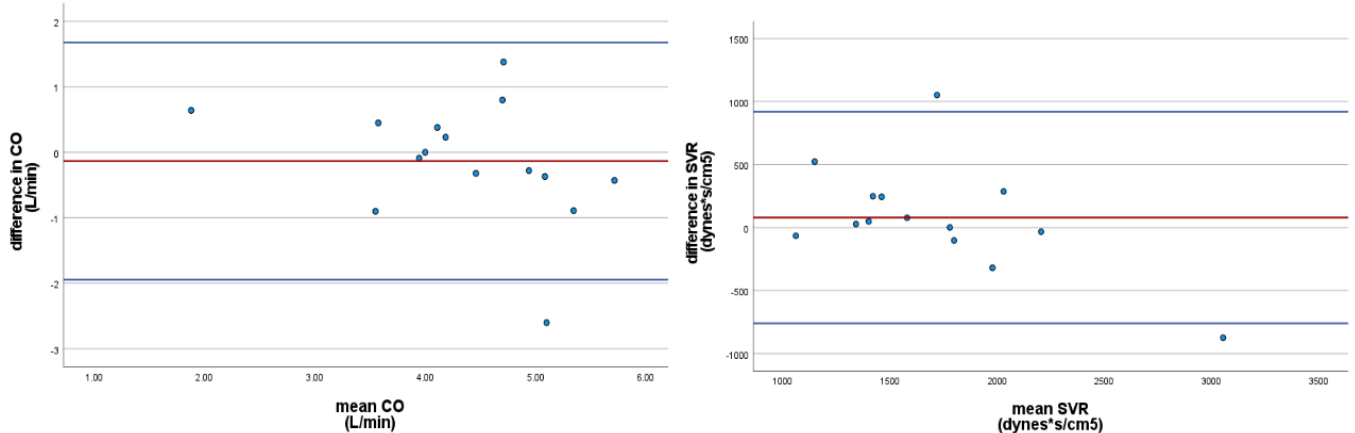

CO - cardiac output; SVR - systemic vascular resistance; TPR - total peripheral resistance.

The internal validation cohort consisted of 15 stable elective patients with advanced heart failure either before or after a heart transplant. Cardiac output calculations were performed using the Fick formula (indirect method) during invasive catheterization. The hemodynamic measures of CO and SVR (or TPR in the case of NICaS) correlated well between the invasive and non-invasive (i.e., NICaS) methods. The two methods showed a level of agreement concerning CO measurements but not concerning SVR measurements (i.e., there is a proportional bias between the two methods in SVR assessment).

**Figure S3:**

Correlation between hemodynamic SV measures assessed by non-invasive NICaS and echocardiography in 46 patients prior o discharge.

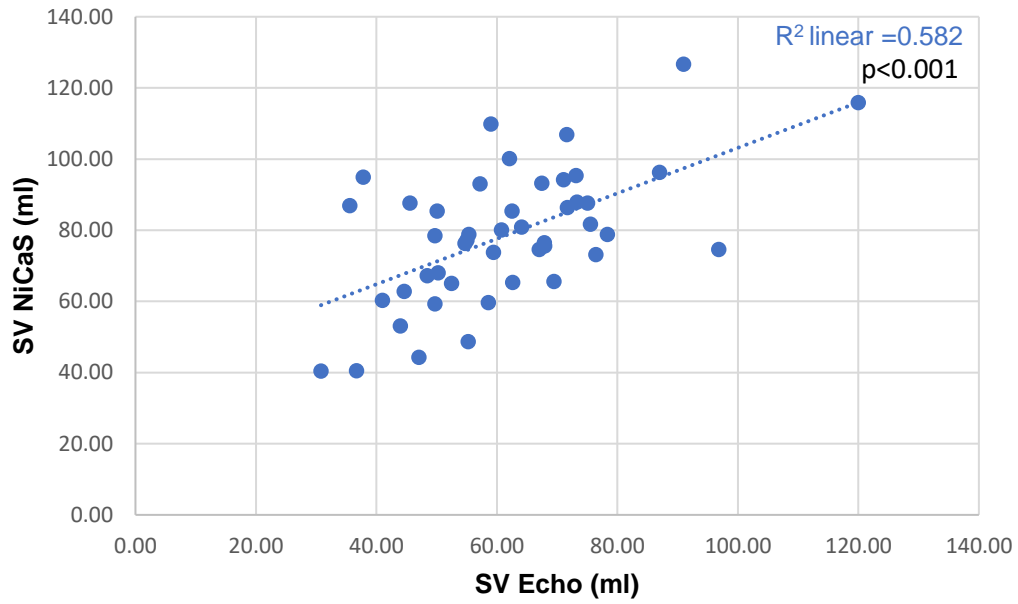

SV- stroke volume
